# Supplementary material
Source: PubMed Central journal article supplement (PMC3135175)
Supplement: NIHMS305445-supplement-Data.pdf [file NIHMS305445-supplement-Data.pdf]

## RESEARCH REPORTS

Clinical

L.R. Iwasaki<sup>1\*</sup>, M.J. Crosby<sup>2</sup>, D.B. Marx<sup>3</sup>,  
Y. Gonzalez<sup>4</sup>, W.D. McCall, Jr.<sup>4</sup>, R. Ohrbach<sup>4</sup>,  
and J.C. Nickel<sup>1</sup>

<sup>1</sup>University of Missouri-Kansas City, School of Dentistry, Departments of Orthodontics & Dentofacial Orthopedics and Oral Biology, 650 E. 25th St., Kansas City, MO 64108-2784, USA; <sup>2</sup>Private Practice, Suwanee, GA 30024-8561, USA; <sup>3</sup>University of Nebraska, Department of Statistics, 340 Hardin Hall North, Lincoln, NE 68583-0963, USA; and <sup>4</sup>University at Buffalo, School of Dental Medicine, Department of Oral Diagnostic Sciences, 355 Squire Hall, Buffalo, NY 14214, USA; \*corresponding author, iwasakil@umkc.edu

*J Dent Res* 89(7):722-727, 2010

# Human Temporomandibular Eminence Shape and Joint Load Minimization

## APPENDIX

**Appendix Table 1.** Results from Healthy Participants without TMJ Disc Displacement, Showing  $x$ ,  $x^2$ , and  $x^3$ -values for Polynomial Equations Describing Effective Sagittal TMJ Eminence Shapes Predicted by a Numerical Model and Measured at Sessions 1 and 2, and  $R^2$ -values and Constants of Proportionality ( $m$ ) for Comparisons of Model-predicted vs. Measured Data

| Subject #<br>Sex | Model-predicted<br>Shape                        | Measured Shape, Session                         |                                                 |                                                 | Model-predicted vs. Measured Data, Session      |                            |                            |                            |                            |
|------------------|-------------------------------------------------|-------------------------------------------------|-------------------------------------------------|-------------------------------------------------|-------------------------------------------------|----------------------------|----------------------------|----------------------------|----------------------------|
|                  |                                                 | 1-Right                                         | 1-Left                                          | 2-Right                                         | 2-Left                                          | 1-Right                    | 1-Left                     | 2-Right                    | 2-Left                     |
| 003<br>Male      | $x = -0.870$<br>$x^2 = 0.060$<br>$x^3 = 0.002$  | $x = -0.319$<br>$x^2 = -0.246$<br>$x^3 = 0.067$ | $x = -1.000$<br>$x^2 = 0.118$<br>$x^3 = -0.002$ | $x = -0.305$<br>$x^2 = -0.261$<br>$x^3 = 0.061$ | $x = -0.917$<br>$x^2 = 0.180$<br>$x^3 = -0.014$ | $R^2 = 0.99$<br>$m = 0.87$ | $R^2 = 0.98$<br>$m = 0.77$ | $R^2 = 0.99$<br>$m = 0.74$ | $R^2 = 0.99$<br>$m = 0.83$ |
| 031<br>Male      | $x = -0.976$<br>$x^2 = 0.091$<br>$x^3 = -0.006$ | $x = -1.095$<br>$x^2 = 0.172$<br>$x^3 = 0.003$  | $x = -0.893$<br>$x^2 = 0.323$<br>$x^3 = -0.029$ | $x = -1.477$<br>$x^2 = 0.176$<br>$x^3 = 0.006$  | $x = -0.512$<br>$x^2 = 0.046$<br>$x^3 = 0.000$  | $R^2 = 0.98$<br>$m = 1.02$ | $R^2 = 0.99$<br>$m = 0.98$ | $R^2 = 0.96$<br>$m = 1.36$ | $R^2 = 0.99$<br>$m = 1.39$ |
| 035<br>Female    | $x = -0.771$<br>$x^2 = 0.034$<br>$x^3 = 0.001$  | $x = -0.888$<br>$x^2 = 0.173$<br>$x^3 = -0.007$ | $x = -0.612$<br>$x^2 = 0.118$<br>$x^3 = -0.006$ | $x = -0.887$<br>$x^2 = 0.148$<br>$x^3 = -0.006$ | $x = -0.535$<br>$x^2 = 0.185$<br>$x^3 = -0.019$ | $R^2 = 0.98$<br>$m = 1.15$ | $R^2 = 0.99$<br>$m = 1.14$ | $R^2 = 0.99$<br>$m = 1.19$ | $R^2 = 0.98$<br>$m = 1.45$ |
| 044<br>Male      | $x = -0.807$<br>$x^2 = 0.027$<br>$x^3 = 0.001$  | $x = -0.973$<br>$x^2 = 0.044$<br>$x^3 = 0.010$  | $x = -0.911$<br>$x^2 = 0.021$<br>$x^3 = 0.018$  | $x = -0.659$<br>$x^2 = -0.020$<br>$x^3 = 0.006$ | $x = -1.098$<br>$x^2 = 0.269$<br>$x^3 = -0.027$ | $R^2 = 0.99$<br>$m = 0.86$ | $R^2 = 0.99$<br>$m = 0.85$ | $R^2 = 0.99$<br>$m = 0.87$ | $R^2 = 0.99$<br>$m = 0.88$ |
| 045<br>Female    | $x = -0.725$<br>$x^2 = 0.040$<br>$x^3 = 0.002$  | $x = -0.706$<br>$x^2 = 0.046$<br>$x^3 = 0.002$  | $x = -1.018$<br>$x^2 = 0.286$<br>$x^3 = -0.022$ | $x = -0.506$<br>$x^2 = -0.040$<br>$x^3 = 0.003$ | $x = -1.310$<br>$x^2 = 0.263$<br>$x^3 = -0.017$ | $R^2 = 0.99$<br>$m = 0.89$ | $R^2 = 0.98$<br>$m = 0.89$ | $R^2 = 0.99$<br>$m = 0.93$ | $R^2 = 0.99$<br>$m = 0.83$ |
| 048<br>Female    | $x = -0.922$<br>$x^2 = 0.229$<br>$x^3 = -0.019$ | $x = -0.491$<br>$x^2 = -0.056$<br>$x^3 = 0.015$ | $x = -0.646$<br>$x^2 = 0.041$<br>$x^3 = 0.003$  | $x = -0.321$<br>$x^2 = -0.134$<br>$x^3 = 0.020$ | $x = -1.235$<br>$x^2 = 0.337$<br>$x^3 = -0.028$ | $R^2 = 0.75$<br>$m = 0.37$ | $R^2 = 0.71$<br>$m = 0.42$ | $R^2 = 0.80$<br>$m = 0.49$ | $R^2 = 0.85$<br>$m = 0.59$ |
| 049<br>Female    | $x = -1.086$<br>$x^2 = 0.072$<br>$x^3 = 0.002$  | $x = -1.123$<br>$x^2 = 0.046$<br>$x^3 = 0.031$  | $x = -1.009$<br>$x^2 = 0.287$<br>$x^3 = -0.029$ | $x = -0.861$<br>$x^2 = -0.162$<br>$x^3 = 0.061$ | $x = -1.607$<br>$x^2 = 0.526$<br>$x^3 = -0.036$ | $R^2 = 0.99$<br>$m = 0.83$ | $R^2 = 0.99$<br>$m = 0.87$ | $R^2 = 0.98$<br>$m = 0.87$ | $R^2 = 0.94$<br>$m = 1.01$ |
| 051<br>Female    | $x = -0.734$<br>$x^2 = 0.041$<br>$x^3 = 0.002$  | $x = -0.834$<br>$x^2 = 0.060$<br>$x^3 = 0.008$  | $x = -0.694$<br>$x^2 = 0.021$<br>$x^3 = 0.006$  | $x = -0.604$<br>$x^2 = 0.013$<br>$x^3 = 0.013$  | $x = -0.887$<br>$x^2 = 0.178$<br>$x^3 = -0.018$ | $R^2 = 0.99$<br>$m = 0.77$ | $R^2 = 0.99$<br>$m = 0.78$ | $R^2 = 0.99$<br>$m = 0.65$ | $R^2 = 0.99$<br>$m = 0.69$ |
| 053<br>Female    | $x = -0.783$<br>$x^2 = 0.052$<br>$x^3 = 0.002$  | $x = -0.569$<br>$x^2 = -0.017$<br>$x^3 = 0.012$ | $x = -0.956$<br>$x^2 = 0.188$<br>$x^3 = -0.012$ | $x = -0.494$<br>$x^2 = -0.034$<br>$x^3 = 0.008$ | $x = -1.579$<br>$x^2 = 0.519$<br>$x^3 = -0.051$ | $R^2 = 0.99$<br>$m = 0.87$ | $R^2 = 0.97$<br>$m = 0.81$ | $R^2 = 0.99$<br>$m = 0.84$ | $R^2 = 0.99$<br>$m = 0.99$ |
| 058<br>Male      | $x = -0.956$<br>$x^2 = 0.224$<br>$x^3 = -0.019$ | $x = -0.868$<br>$x^2 = 0.153$<br>$x^3 = -0.006$ | $x = -0.150$<br>$x^2 = -0.225$<br>$x^3 = 0.052$ | $x = -0.750$<br>$x^2 = 0.159$<br>$x^3 = -0.007$ | $x = -0.439$<br>$x^2 = -0.126$<br>$x^3 = 0.029$ | $R^2 = 0.93$<br>$m = 0.53$ | $R^2 = 0.89$<br>$m = 0.47$ | $R^2 = 0.86$<br>$m = 0.56$ | $R^2 = 0.86$<br>$m = 0.50$ |
| 062<br>Male      | $x = -0.868$<br>$x^2 = 0.059$<br>$x^3 = 0.002$  | $x = -0.952$<br>$x^2 = 0.119$<br>$x^3 = -0.003$ | $x = -1.413$<br>$x^2 = 0.293$<br>$x^3 = -0.024$ | $x = -0.761$<br>$x^2 = -0.037$<br>$x^3 = 0.024$ | $x = -0.874$<br>$x^2 = 0.102$<br>$x^3 = -0.005$ | $R^2 = 0.99$<br>$m = 0.91$ | $R^2 = 0.99$<br>$m = 1.02$ | $R^2 = 0.99$<br>$m = 0.77$ | $R^2 = 0.99$<br>$m = 0.85$ |
| 064<br>Female    | $x = -0.642$<br>$x^2 = 0.044$<br>$x^3 = 0.001$  | $x = -1.25$<br>$x^2 = 0.220$<br>$x^3 = -0.010$  | $x = -0.732$<br>$x^2 = 0.136$<br>$x^3 = -0.013$ | $x = -0.732$<br>$x^2 = -0.005$<br>$x^3 = 0.009$ | $x = -0.689$<br>$x^2 = 0.004$<br>$x^3 = 0.008$  | $R^2 = 0.96$<br>$m = 0.68$ | $R^2 = 0.96$<br>$m = 0.75$ | $R^2 = 0.99$<br>$m = 0.81$ | $R^2 = 0.98$<br>$m = 0.75$ |
| 065<br>Male      | $x = -0.597$<br>$x^2 = 0.029$<br>$x^3 = 0.001$  | $x = -0.933$<br>$x^2 = -0.323$<br>$x^3 = 0.124$ | $x = -1.479$<br>$x^2 = 0.393$<br>$x^3 = -0.028$ | $x = -3.042$<br>$x^2 = 1.612$<br>$x^3 = -0.292$ | $x = -0.679$<br>$x^2 = 0.028$<br>$x^3 = 0.007$  | $R^2 = 0.97$<br>$m = 0.68$ | $R^2 = 0.97$<br>$m = 0.55$ | $R^2 = 0.99$<br>$m = 0.72$ | $R^2 = 0.99$<br>$m = 0.79$ |

(continued)

**Appendix Table 1.** (continued)

| Subject #<br>Sex | Model-predicted<br>Shape                                         | Measured Shape, Session                                         |                                                                 |                                                                 | Model-predicted vs. Measured Data, Session                      |                                   |                                   |                                   |                                   |
|------------------|------------------------------------------------------------------|-----------------------------------------------------------------|-----------------------------------------------------------------|-----------------------------------------------------------------|-----------------------------------------------------------------|-----------------------------------|-----------------------------------|-----------------------------------|-----------------------------------|
|                  |                                                                  | 1-Right                                                         | 1-Left                                                          | 2-Right                                                         | 2-Left                                                          | 1-Right                           | 1-Left                            | 2-Right                           | 2-Left                            |
| 066<br>Male      | x = -0.911<br>x <sup>2</sup> = 0.066<br>x <sup>3</sup> = -0.0002 | x = -0.702<br>x <sup>2</sup> = -0.219<br>x <sup>3</sup> = 0.025 | x = -1.233<br>x <sup>2</sup> = 0.226<br>x <sup>3</sup> = -0.016 | x = -0.939<br>x <sup>2</sup> = -0.747<br>x <sup>3</sup> = 0.144 | x = -1.384<br>x <sup>2</sup> = 0.177<br>x <sup>3</sup> = 0.003  | R <sup>2</sup> = 0.95<br>m = 0.55 | R <sup>2</sup> = 0.95<br>m = 0.54 | R <sup>2</sup> = 0.99<br>m = 0.75 | R <sup>2</sup> = 0.99<br>m = 0.69 |
| 068<br>Female    | x = -0.878<br>x <sup>2</sup> = 0.036<br>x <sup>3</sup> = 0.001   | x = -0.454<br>x <sup>2</sup> = -0.506<br>x <sup>3</sup> = 0.100 | x = -0.792<br>x <sup>2</sup> = 0.072<br>x <sup>3</sup> = 0.002  | x = -0.354<br>x <sup>2</sup> = -0.493<br>x <sup>3</sup> = 0.087 | x = -0.526<br>x <sup>2</sup> = -0.048<br>x <sup>3</sup> = 0.013 | R <sup>2</sup> = 0.98<br>m = 0.74 | R <sup>2</sup> = 0.97<br>m = 0.73 | R <sup>2</sup> = 0.99<br>m = 0.84 | R <sup>2</sup> = 0.99<br>m = 0.85 |
| 072<br>Female    | x = -1.041<br>x <sup>2</sup> = 0.062<br>x <sup>3</sup> = 0.001   | x = -0.786<br>x <sup>2</sup> = -0.409<br>x <sup>3</sup> = 0.083 | x = -1.223<br>x <sup>2</sup> = 0.225<br>x <sup>3</sup> = -0.010 | x = -0.432<br>x <sup>2</sup> = -0.417<br>x <sup>3</sup> = 0.073 | x = -1.088<br>x <sup>2</sup> = 0.072<br>x <sup>3</sup> = 0.001  | R <sup>2</sup> = 0.97<br>m = 0.74 | R <sup>2</sup> = 0.97<br>m = 0.73 | R <sup>2</sup> = 0.99<br>m = 0.81 | R <sup>2</sup> = 0.99<br>m = 0.79 |
| 074<br>Male      | x = -0.524<br>x <sup>2</sup> = 0.036<br>x <sup>3</sup> = 0.002   | x = -0.450<br>x <sup>2</sup> = -0.041<br>x <sup>3</sup> = 0.013 | x = -2.030<br>x <sup>2</sup> = 0.581<br>x <sup>3</sup> = -0.037 | x = -0.487<br>x <sup>2</sup> = -0.072<br>x <sup>3</sup> = 0.020 | x = -1.431<br>x <sup>2</sup> = 0.422<br>x <sup>3</sup> = -0.028 | R <sup>2</sup> = 0.93<br>m = 0.63 | R <sup>2</sup> = 0.96<br>m = 0.73 | R <sup>2</sup> = 0.98<br>m = 0.45 | R <sup>2</sup> = 0.99<br>m = 0.42 |

Sub-category information for type of disc displacement, based on Research Diagnostic Criteria for temporomandibular disorders (Dworkin and LeResche, 1992), is also provided according to: (a) with reduction, (b) without reduction with limited opening, (c) without reduction without limited opening, and (nd) not displaced.

**Appendix Table 2.** Results from Participants with TMJ Disc Displacement, Showing  $x$ ,  $x^2$ ,  $x^3$ -values for Polynomial Equations Describing Effective Sagittal TMJ Eminence Shapes Predicted by a Numerical Model and Measured at Sessions 1 and 2, and  $R^2$ -values and Constants of Proportionality ( $m$ ) for Comparisons of Model-predicted vs. Measured Data

| Subject #<br>Sex<br>Side: type        | Model-predicted<br>Shape                         |                                                 |                                                 | Measured Shape, Session                         |                            |                            | Model-predicted vs. Measured Data, Session |                            |  |
|---------------------------------------|--------------------------------------------------|-------------------------------------------------|-------------------------------------------------|-------------------------------------------------|----------------------------|----------------------------|--------------------------------------------|----------------------------|--|
|                                       | 1-Right                                          | 1-Left                                          | 2-Right                                         | 2-Left                                          | 1-Right                    | 1-Left                     | 2-Right                                    | 2-Left                     |  |
| 004<br>Female<br>Right: a<br>Left: a  | $x = -0.797$<br>$x^2 = 0.056$<br>$x^3 = -0.001$  | $x = -0.787$<br>$x^2 = 0.092$<br>$x^3 = 0.001$  | $x = -1.058$<br>$x^2 = 0.155$<br>$x^3 = -0.002$ | $x = -1.218$<br>$x^2 = 0.246$<br>$x^3 = -0.011$ | $R^2 = 0.99$<br>$m = 0.90$ | $R^2 = 0.99$<br>$m = 0.76$ | $R^2 = 0.99$<br>$m = 0.87$                 | $R^2 = 0.98$<br>$m = 0.76$ |  |
| 010<br>Female<br>Right: b<br>Left: b  | $x = -0.734$<br>$x^2 = 0.055$<br>$x^3 = 0.006$   | $x = -1.118$<br>$x^2 = 0.322$<br>$x^3 = -0.026$ | $x = -0.776$<br>$x^2 = 0.141$<br>$x^3 = -0.008$ | $x = -0.354$<br>$x^2 = -0.087$<br>$x^3 = 0.016$ | $R^2 = 0.88$<br>$m = 0.56$ | $R^2 = 0.95$<br>$m = 0.76$ | $R^2 = 0.98$<br>$m = 0.81$                 | $R^2 = 0.87$<br>$m = 0.75$ |  |
| 011<br>Female<br>Right: a<br>Left: nd | $x = -0.665$<br>$x^2 = 0.044$<br>$x^3 = 0.002$   | $x = -0.671$<br>$x^2 = 0.004$<br>$x^3 = 0.006$  | $x = -1.736$<br>$x^2 = 0.421$<br>$x^3 = -0.033$ | $x = -0.756$<br>$x^2 = 0.072$<br>$x^3 = -0.001$ | $R^2 = 0.99$<br>$m = 0.65$ | $R^2 = 0.99$<br>$m = 0.55$ | $R^2 = 0.99$<br>$m = 0.71$                 | $R^2 = 0.98$<br>$m = 0.66$ |  |
| 016<br>Male<br>Right: a<br>Left: a    | $x = -0.625$<br>$x^2 = 0.051$<br>$x^3 = -0.0001$ | $x = -0.565$<br>$x^2 = 0.049$<br>$x^3 = -0.004$ | $x = -0.526$<br>$x^2 = 0.102$<br>$x^3 = -0.006$ | $x = -0.465$<br>$x^2 = 0.033$<br>$x^3 = -0.003$ | $R^2 = 0.98$<br>$m = 0.70$ | $R^2 = 0.99$<br>$m = 0.79$ | $R^2 = 0.98$<br>$m = 0.81$                 | $R^2 = 0.98$<br>$m = 0.81$ |  |
| 019<br>Female<br>Right: c<br>Left: c  | $x = -0.648$<br>$x^2 = 0.036$<br>$x^3 = 0.001$   | $x = -1.123$<br>$x^2 = 0.314$<br>$x^3 = -0.024$ | $x = -0.531$<br>$x^2 = -0.092$<br>$x^3 = 0.014$ | $x = -2.863$<br>$x^2 = 0.989$<br>$x^3 = -0.104$ | $R^2 = 0.33$<br>$m = 0.55$ | $R^2 = 0.99$<br>$m = 0.84$ | $R^2 = 0.98$<br>$m = 0.83$                 | $R^2 = 0.99$<br>$m = 0.89$ |  |
| 037<br>Female<br>Right: a<br>Left: a  | $x = -1.053$<br>$x^2 = 0.114$<br>$x^3 = -0.010$  | $x = -1.217$<br>$x^2 = 0.317$<br>$x^3 = -0.024$ | $x = -1.356$<br>$x^2 = 0.123$<br>$x^3 = 0.005$  | $x = -0.415$<br>$x^2 = 0.074$<br>$x^3 = -0.008$ | $R^2 = 0.99$<br>$m = 0.78$ | $R^2 = 0.99$<br>$m = 0.78$ | $R^2 = 0.97$<br>$m = 1.13$                 | $R^2 = 0.98$<br>$m = 1.19$ |  |
| 042<br>Male<br>Right: a<br>Left: a    | $x = -0.849$<br>$x^2 = 0.042$<br>$x^3 = 0.001$   | $x = -1.126$<br>$x^2 = 0.308$<br>$x^3 = -0.013$ | $x = -0.822$<br>$x^2 = 0.086$<br>$x^3 = 0.010$  | $x = -1.123$<br>$x^2 = 0.264$<br>$x^3 = -0.016$ | $R^2 = 0.99$<br>$m = 1.33$ | $R^2 = 0.99$<br>$m = 1.23$ | $R^2 = 0.95$<br>$m = 1.21$                 | $R^2 = 0.99$<br>$m = 1.28$ |  |
| 047<br>Female<br>Right: a<br>Left: a  | $x = -0.842$<br>$x^2 = 0.055$<br>$x^3 = 0.003$   | $x = -1.074$<br>$x^2 = 0.179$<br>$x^3 = -0.010$ | $x = -0.949$<br>$x^2 = 0.077$<br>$x^3 = 0.003$  | $x = -0.571$<br>$x^2 = -0.028$<br>$x^3 = 0.015$ | $R^2 = 0.96$<br>$m = 0.65$ | $R^2 = 0.97$<br>$m = 0.66$ | $R^2 = 0.98$<br>$m = 0.74$                 | $R^2 = 0.97$<br>$m = 0.72$ |  |
| 052<br>Female<br>Right: a<br>Left: a  | $x = -1.143$<br>$x^2 = 0.030$<br>$x^3 = 0.001$   | $x = -1.977$<br>$x^2 = 0.341$<br>$x^3 = -0.029$ | $x = -1.272$<br>$x^2 = 0.044$<br>$x^3 = 0.012$  | $x = -2.322$<br>$x^2 = 0.326$<br>$x^3 = 0.043$  | $R^2 = 0.99$<br>$m = 0.88$ | $R^2 = 0.99$<br>$m = 0.88$ | $R^2 = 0.99$<br>$m = 0.91$                 | $R^2 = 0.98$<br>$m = 0.92$ |  |

(continued)

**Appendix Table 2.** (continued)

| Subject #<br>Sex                      | Model-<br>predicted<br>Shape                                    | Measured Shape, Session                                         |                                                                  |                                                                 |                                                                 |                                   |                                   | Model-predicted vs. Measured Data, Session |                                   |         |  |        |  |         |  |
|---------------------------------------|-----------------------------------------------------------------|-----------------------------------------------------------------|------------------------------------------------------------------|-----------------------------------------------------------------|-----------------------------------------------------------------|-----------------------------------|-----------------------------------|--------------------------------------------|-----------------------------------|---------|--|--------|--|---------|--|
|                                       |                                                                 | 1-Right                                                         |                                                                  | 1-Left                                                          |                                                                 | 2-Right                           |                                   | 2-Left                                     |                                   | 1-Right |  | 1-Left |  | 2-Right |  |
| 055<br>Female<br>Right: nd<br>Left: a | x = -1.006<br>x <sup>2</sup> = 0.095<br>x <sup>3</sup> = 0.007  | x = -0.870<br>x <sup>2</sup> = 0.066<br>x <sup>3</sup> = 0.011  | x = -0.738<br>x <sup>2</sup> = 0.046<br>x <sup>3</sup> = 0.0001  | x = -1.043<br>x <sup>2</sup> = 0.033<br>x <sup>3</sup> = 0.014  | x = -0.814<br>x <sup>2</sup> = 0.130<br>x <sup>3</sup> = -0.011 | R <sup>2</sup> = 0.87<br>m = 0.63 | R <sup>2</sup> = 0.83<br>m = 0.63 | R <sup>2</sup> = 0.82<br>m = 0.63          | R <sup>2</sup> = 0.84<br>m = 0.60 |         |  |        |  |         |  |
| 059<br>Male<br>Right: c<br>Left: c    | x = -0.362<br>x <sup>2</sup> = 0.032<br>x <sup>3</sup> = 0.001  | x = -0.055<br>x <sup>2</sup> = -0.532<br>x <sup>3</sup> = 0.056 | x = 0.273<br>x <sup>2</sup> = -0.055<br>x <sup>3</sup> = -0.001  | x = -1.225<br>x <sup>2</sup> = -0.031<br>x <sup>3</sup> = 0.018 | x = -0.398<br>x <sup>2</sup> = 0.085<br>x <sup>3</sup> = -0.009 | R <sup>2</sup> = 0.99<br>m = 0.44 | R <sup>2</sup> = 0.99<br>m = 0.47 | R <sup>2</sup> = 0.99<br>m = 1.10          | R <sup>2</sup> = 0.99<br>m = 1.21 |         |  |        |  |         |  |
| 061<br>Male<br>Right: b<br>Left: nd   | x = -0.857<br>x <sup>2</sup> = 0.036<br>x <sup>3</sup> = 0.001  | x = -1.572<br>x <sup>2</sup> = 0.217<br>x <sup>3</sup> = -0.013 | x = -1.146<br>x <sup>2</sup> = 0.247<br>x <sup>3</sup> = -0.017  | x = -0.693<br>x <sup>2</sup> = -0.057<br>x <sup>3</sup> = 0.010 | x = -1.671<br>x <sup>2</sup> = 0.564<br>x <sup>3</sup> = -0.057 | R <sup>2</sup> = 0.97<br>m = 0.77 | R <sup>2</sup> = 0.98<br>m = 0.87 | R <sup>2</sup> = 0.99<br>m = 0.97          | R <sup>2</sup> = 0.98<br>m = 0.98 |         |  |        |  |         |  |
| 063<br>Male<br>Right: a<br>Left: a    | x = -1.002<br>x <sup>2</sup> = 0.047<br>x <sup>3</sup> = 0.001  | x = -0.551<br>x <sup>2</sup> = -0.164<br>x <sup>3</sup> = 0.026 | x = -0.839<br>x <sup>2</sup> = 0.088<br>x <sup>3</sup> = 0.008   | x = -1.114<br>x <sup>2</sup> = 0.117<br>x <sup>3</sup> = 0.005  | x = -1.174<br>x <sup>2</sup> = 0.221<br>x <sup>3</sup> = -0.018 | R <sup>2</sup> = 0.99<br>m = 0.88 | R <sup>2</sup> = 0.99<br>m = 0.93 | R <sup>2</sup> = 0.99<br>m = 0.94          | R <sup>2</sup> = 0.99<br>m = 0.81 |         |  |        |  |         |  |
| 067<br>Male<br>Right: nd<br>Left: c   | x = -0.618<br>x <sup>2</sup> = 0.040<br>x <sup>3</sup> = 0.001  | x = -0.716<br>x <sup>2</sup> = 0.059<br>x <sup>3</sup> = 0.007  | x = -0.095<br>x <sup>2</sup> = -0.040<br>x <sup>3</sup> = 0.004  | x = -0.650<br>x <sup>2</sup> = 0.042<br>x <sup>3</sup> = 0.002  | x = -0.186<br>x <sup>2</sup> = 0.054<br>x <sup>3</sup> = -0.005 | R <sup>2</sup> = 0.98<br>m = 0.71 | R <sup>2</sup> = 0.98<br>m = 0.75 | R <sup>2</sup> = 0.94<br>m = 2.88          | R <sup>2</sup> = 0.89<br>m = 4.57 |         |  |        |  |         |  |
| 069<br>Female<br>Right: c<br>Left: a  | x = -1.258<br>x <sup>2</sup> = 0.235<br>x <sup>3</sup> = -0.026 | x = -1.179<br>x <sup>2</sup> = 0.120<br>x <sup>3</sup> = 0.003  | x = -1.3862<br>x <sup>2</sup> = 0.241<br>x <sup>3</sup> = -0.016 | x = -0.227<br>x <sup>2</sup> = -0.139<br>x <sup>3</sup> = 0.019 | x = -1.105<br>x <sup>2</sup> = 0.221<br>x <sup>3</sup> = -0.013 | R <sup>2</sup> = 0.98<br>m = 1.37 | R <sup>2</sup> = 0.99<br>m = 1.32 | R <sup>2</sup> = 0.99<br>m = 0.76          | R <sup>2</sup> = 0.98<br>m = 0.77 |         |  |        |  |         |  |
| 071<br>Male<br>Right: a<br>Left: a    | x = -1.170<br>x <sup>2</sup> = 0.037<br>x <sup>3</sup> = 0.001  | x = -0.988<br>x <sup>2</sup> = -0.019<br>x <sup>3</sup> = 0.012 | x = -1.104<br>x <sup>2</sup> = -0.023<br>x <sup>3</sup> = 0.013  | x = -1.264<br>x <sup>2</sup> = 0.082<br>x <sup>3</sup> = 0.007  | x = -1.052<br>x <sup>2</sup> = 0.029<br>x <sup>3</sup> = 0.006  | R <sup>2</sup> = 0.99<br>m = 0.92 | R <sup>2</sup> = 0.99<br>m = 0.93 | R <sup>2</sup> = 0.99<br>m = 0.91          | R <sup>2</sup> = 0.99<br>m = 0.88 |         |  |        |  |         |  |
| 073<br>Male<br>Right: a<br>Left: a    | x = -0.561<br>x <sup>2</sup> = 0.030<br>x <sup>3</sup> = 0.001  | x = -0.428<br>x <sup>2</sup> = -0.012<br>x <sup>3</sup> = 0.004 | x = -1.219<br>x <sup>2</sup> = 0.168<br>x <sup>3</sup> = -0.005  | x = -0.222<br>x <sup>2</sup> = -0.084<br>x <sup>3</sup> = 0.011 | x = -0.992<br>x <sup>2</sup> = 0.130<br>x <sup>3</sup> = -0.003 | R <sup>2</sup> = 0.95<br>m = 0.87 | R <sup>2</sup> = 0.95<br>m = 0.87 | R <sup>2</sup> = 0.998<br>m = 0.45         | R <sup>2</sup> = 0.99<br>m = 0.44 |         |  |        |  |         |  |
